# Supplementary material for: Understanding the Pyrimethamine Drug Resistance Mechanism via Combined Molecular Dynamics and Dynamic Residue Network Analysis
Source: MDPI journal article supplement (doi:10.3390/molecules25040904), 2020-02-18
Supplement: s1 [file s1]

1 *Supplementary Material*

2 Understanding the pyrimethamine drug resistance  
3 mechanism via combined molecular dynamics and  
4 dynamic residue network analysis

5 *Arnold Amusengeri<sup>1a, †</sup>, Rolland Bantar Tata<sup>1b, †</sup>, and Özlem Tastan Bishop<sup>1c, \*</sup>*

6 <sup>1</sup>Research Unit in Bioinformatics (RUBi), Department of Biochemistry and Microbiology,  
7 Rhodes University, Grahamstown, 6140, South Africa; [g16a7782@campus.ru.ac.za](mailto:g16a7782@campus.ru.ac.za) <sup>1a</sup>,  
8 [g18t9691@campus.ru.ac.za](mailto:g18t9691@campus.ru.ac.za) <sup>1b</sup>, [O.TastanBishop@ru.ac.za](mailto:O.TastanBishop@ru.ac.za) <sup>1c</sup>

9 Correspondence: [O.TastanBishop@ru.ac.za](mailto:O.TastanBishop@ru.ac.za); Tel.: +27-46-603-8072

10 † These authors contributed equally to this work

**Table S1: Validation of homology modelled structures:** Tabulated summary of Z-DOPE scores, Ramachandran values, Verify-3D percentages and ProSA z-scores.

| Protein Model         | Z-DOPE score | Ramachandran Plot                               |                                                |                                                | Verify3D (%) | PROSA (Z-Score) |
|-----------------------|--------------|-------------------------------------------------|------------------------------------------------|------------------------------------------------|--------------|-----------------|
|                       |              | Number of favoured region residues (Percentage) | Number of allowed region residues (Percentage) | Number of outlier region residues (Percentage) |              |                 |
| Wild_type             | -1.04        | 1072 ( 95.0)                                    | 47 ( 4.2)                                      | 9 ( 0.8)                                       | 86.4         | -10.81          |
| S108N                 | -1.07        | 1074 ( 95.2)                                    | 45 ( 4.0)                                      | 9 ( 0.8)                                       | 88.16        | -10.5           |
| N51I_S108N            | -1.04        | 1079 ( 95.7)                                    | 44 ( 3.9)                                      | 5 ( 0.4)                                       | 85.6         | -10.54          |
| C59R_S108N            | -1.05        | 1083 ( 96.0)                                    | 40 ( 3.5)                                      | 5 ( 0.4)                                       | 89.13        | -10.57          |
| N51I_C59R_S108N       | -1.04        | 1078 ( 95.6)                                    | 44 ( 3.9)                                      | 6 ( 0.5)                                       | 87.28        | -10.65          |
| C59R_S108N_I164L      | -1.04        | 1083 ( 96.0)                                    | 39 ( 3.5)                                      | 6 ( 0.5)                                       | 83.22        | -10.8           |
| N51I_C59R_S108N_I164L | -1.05        | 1082 ( 95.9)                                    | 39 ( 3.5)                                      | 7 ( 0.6)                                       | 83.13        | -10.59          |

15 **Table S2: Docking scores of pyrimethamine in wild type and mutants:** Table showing  
16 Vina docking scores and DSX rescoring values.

17

| <b>Protein</b>        | <b>Pyrimethamine<br/>Vina Score (Kcal/mol)</b> | <b>RMSD</b> |
|-----------------------|------------------------------------------------|-------------|
| wild_type             | -9.4                                           | 0.658       |
| S108N                 | -9.8                                           | 0.744       |
| N51I_S108N            | -8.4                                           | 5.904       |
| C59R_S108N            | -8.8                                           | 0.580       |
| N51I_C59R_S108N       | -8.4                                           | 0.849       |
| C59R_S108N_I164L      | -7.7                                           | 6.595       |
| N51I_C59R_S108N_I164L | -9                                             | 1.033       |

18

(a) WT-PYR

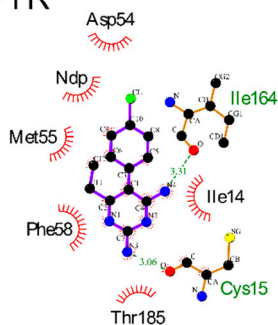

(b) S108N-PYR

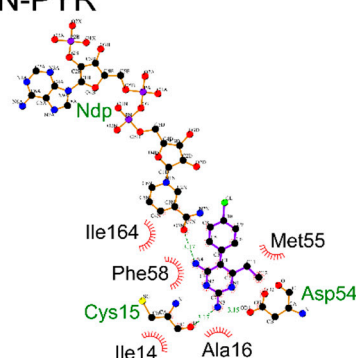

(c) N51I\_S108N-PYR

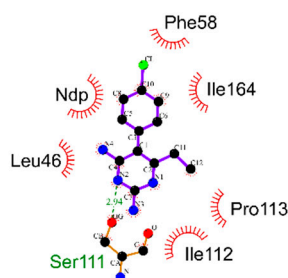

(d) C59R\_S108N-PYR

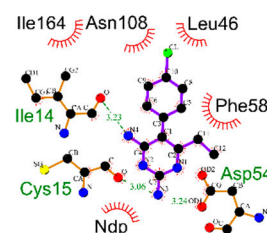

(e) N51I\_C59R\_S108N-PYR

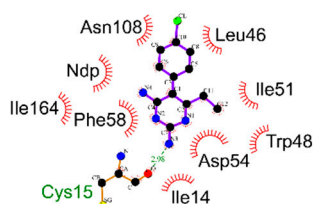

(f) C59R\_S108N\_I164L-PYR

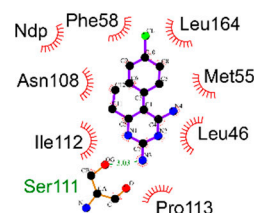

(g) N51I\_C59R\_S108N\_I164L-PYR

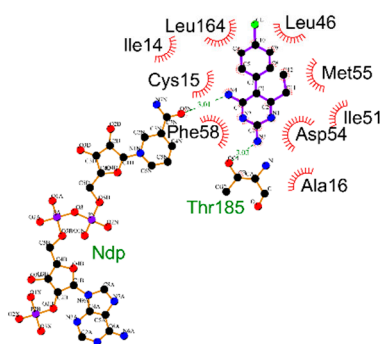

19

20 **Figure S1: Molecular docking poses and interactions visualized using LigPlot+.** (A)  
21 Shows binding pocket as transparent grey surface with pyrimethamine (purple) and NADP  
22 inside. Residues found around active site are shown as sticks. (B) Pyrimethamine is  
23 represented in ball and stick, with bonds shown as purple solid lines. Protein residues or  
24 NADPH forming hydrogen bonds are also represented in ball and stick with bonds shown as  
25 brown solid lines. Hydrogen bonds are shown as dashed green lines.

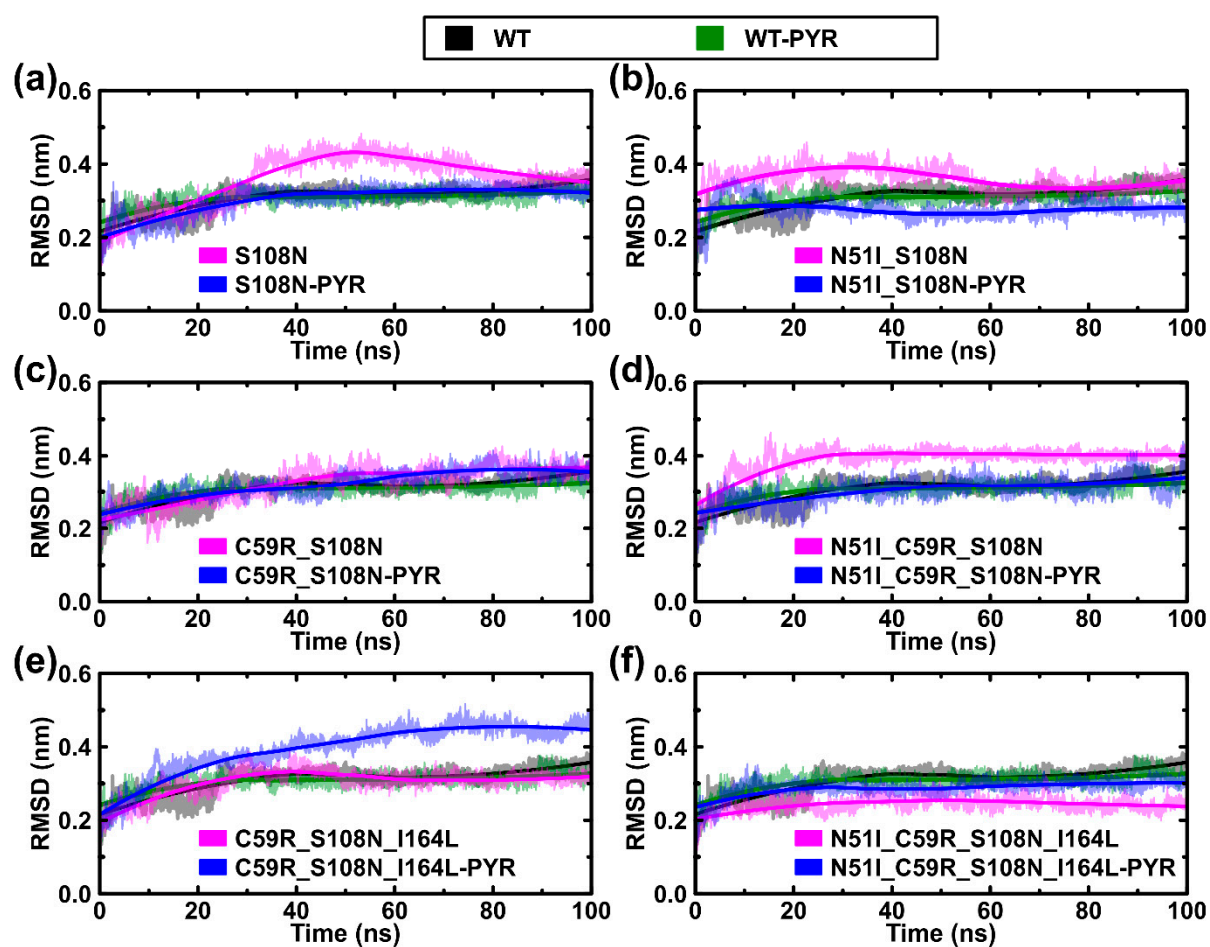

29 **Table S3:** Calculated average protein RMSD values.

30

|                     | System                      | Average RMSD (nm) |
|---------------------|-----------------------------|-------------------|
| Pyrimethamine-bound | Wildtype – PYR              | 0.31              |
|                     | S108N – PYR                 | 0.30              |
|                     | N51I_S108N – PYR            | 0.28              |
|                     | C59R_S108N – PYR            | 0.32              |
|                     | N51I_C59R_S108N – PYR       | 0.30              |
|                     | C59R_S108N_I164L – PYR      | 0.40              |
|                     | N51I_C59R_S108N_I164L – PYR | 0.29              |
| Pyrimethamine-free  | Wildtype                    | 0.31              |
|                     | S108N                       | 0.36              |
|                     | N51I_S108N                  | 0.36              |
|                     | C59R_S108N                  | 0.32              |
|                     | N51I_C59R_S108N             | 0.39              |
|                     | C59R_S108N_I164L            | 0.30              |
|                     | N51I_C59R_S108N_I164L       | 0.24              |

31

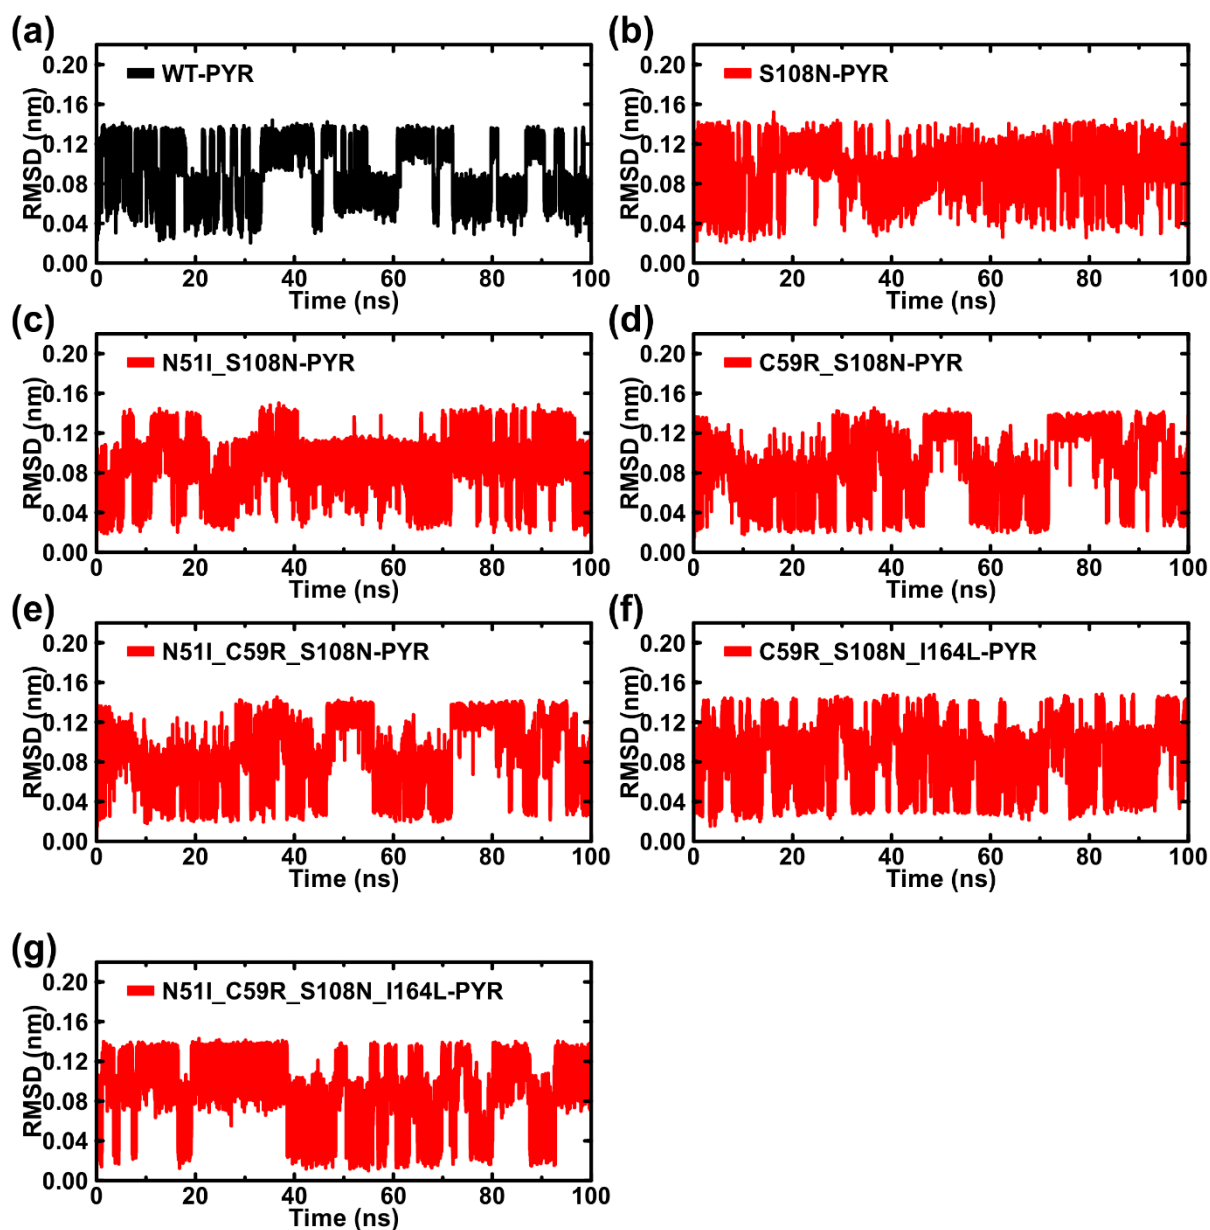

**Figure S3:** Ligand RMSDs: RMSD evolution of pyrimethamine complexed with WT and mutated PfDHFR during 100ns simulation. Color key: black: pyrimethamine-bound WT, red: pyrimethamine-bound mutants.

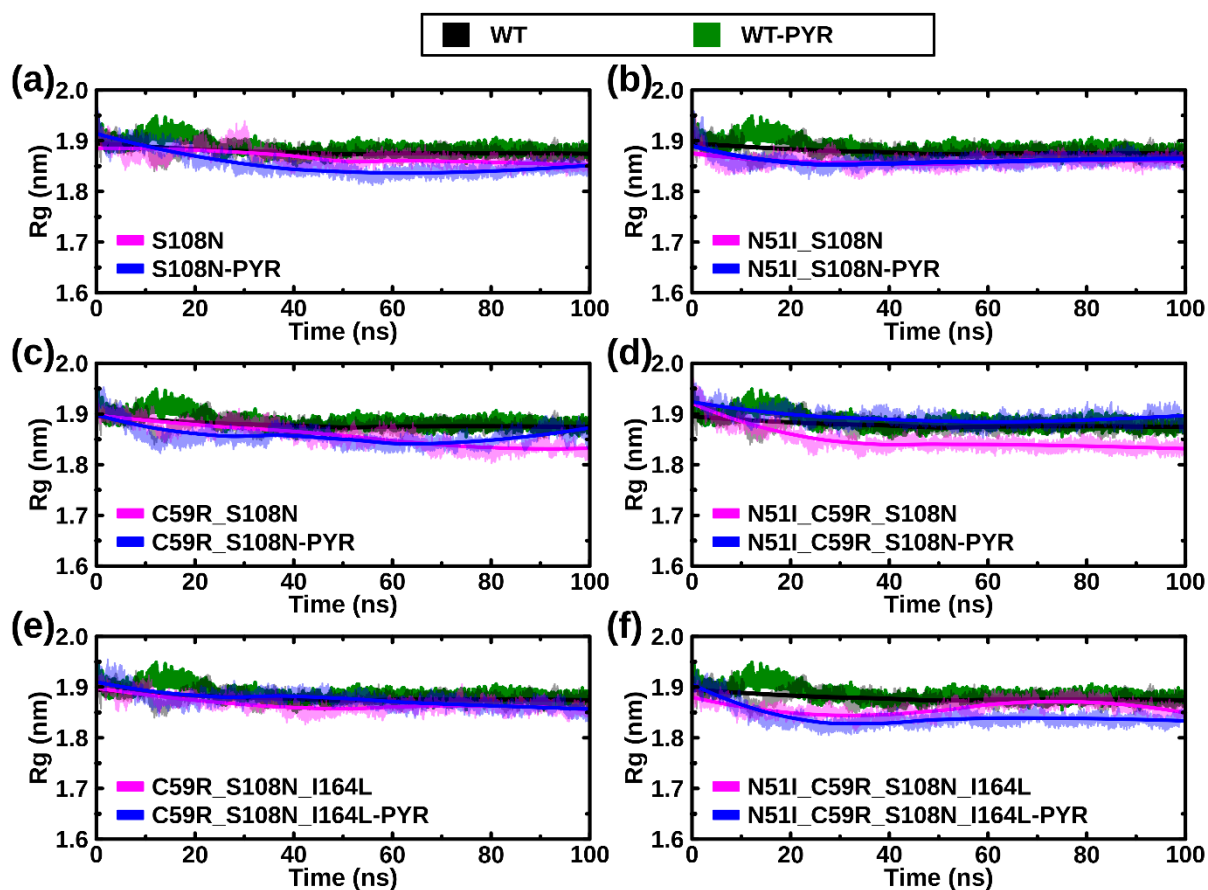

**Figure S4:** Radius of gyration (Rg) plots depicting the evolution of *p*/DHFR structure compactness over 100ns period.



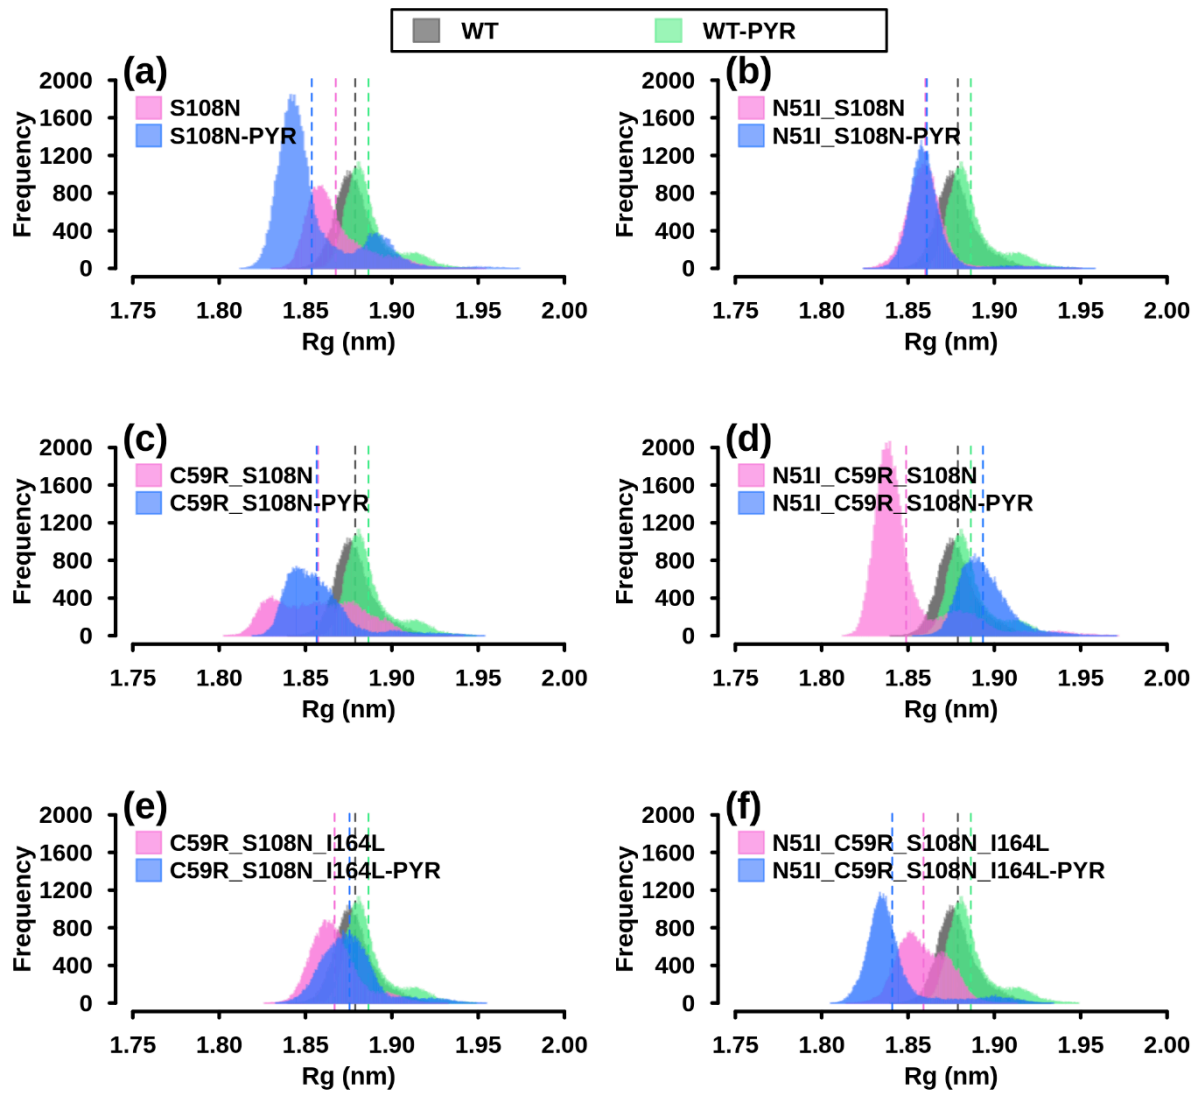

39

40 **Figure S5:** Histograms of the radius of gyration ( $R_g$ ).

**Table S4: Principal component analysis:** Percentage variance contribution of the top two eigenvectors to overall motion.

| System                | Pyrimethamine free percentage variance |        | Pyrimethamine bound percentage variance |        |
|-----------------------|----------------------------------------|--------|-----------------------------------------|--------|
|                       | PC1                                    | PC2    | PC1                                     | PC2    |
| WT                    | 23.95%                                 | 14.04% | 46.15%                                  | 7.29%  |
| S108N                 | 46.84%                                 | 13.84% | 35.21%                                  | 16.30% |
| N51I_S108N            | 34.48%                                 | 19.11% | 21.91%                                  | 11.15% |
| C59R_S108N            | 34.09%                                 | 16.79% | 31.45%                                  | 12.08% |
| N51I_C59R_S108N       | 23.99%                                 | 18.27% | 36.48%                                  | 13.16% |
| C59R_S108N_I164L      | 28.43%                                 | 13.54% | 42.48%                                  | 16.62% |
| N51I_C59R_S108N_I164L | 25.98%                                 | 15.51% | 34.27%                                  | 10.37% |

## Pyrimethamine-free

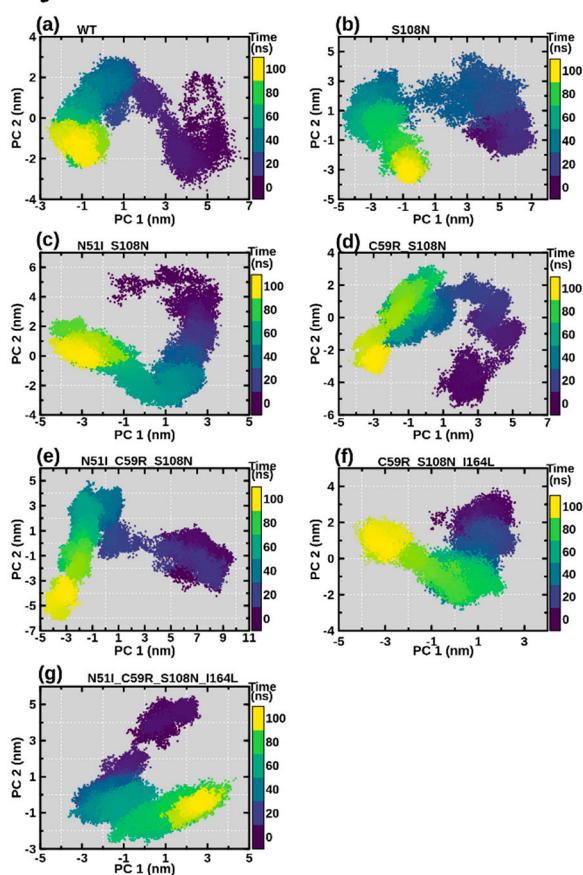

## Pyrimethamine-bound

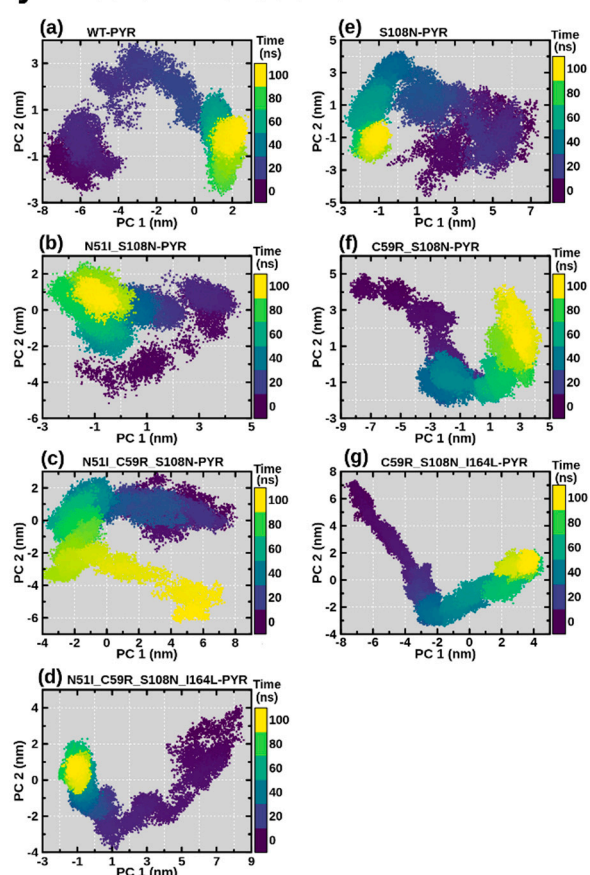

**Figure S6: Principal component analysis results of both WT and mutated Pyrimethamine-bound and Pyrimethamine-free PfDHFR. 2D projections of the top two eigenvectors versus time evolution from black (0 ns) to yellow (100 ns).**

49 **Table S5:** Computed trace values (sum of 2079 eigenvalues) of diagonalized covariance  
 50 matrices for each model.

51

| System                | Pyrimethamine free | Pyrimethamine bound |
|-----------------------|--------------------|---------------------|
|                       | Trace value        | Trace value         |
| WT                    | 13.0925            | 15.8886             |
| S108N                 | 23.3786            | 15.5614             |
| N51I_S108N            | 14.0945            | 9.96848             |
| C59R_S108N            | 22.6307            | 17.6195             |
| N51I_C59R_S108N       | 15.5534            | 18.3309             |
| C59R_S108N_I164L      | 15.0566            | 22.2634             |
| N51I_C59R_S108N_I164L | 13.6105            | 11.6472             |

52

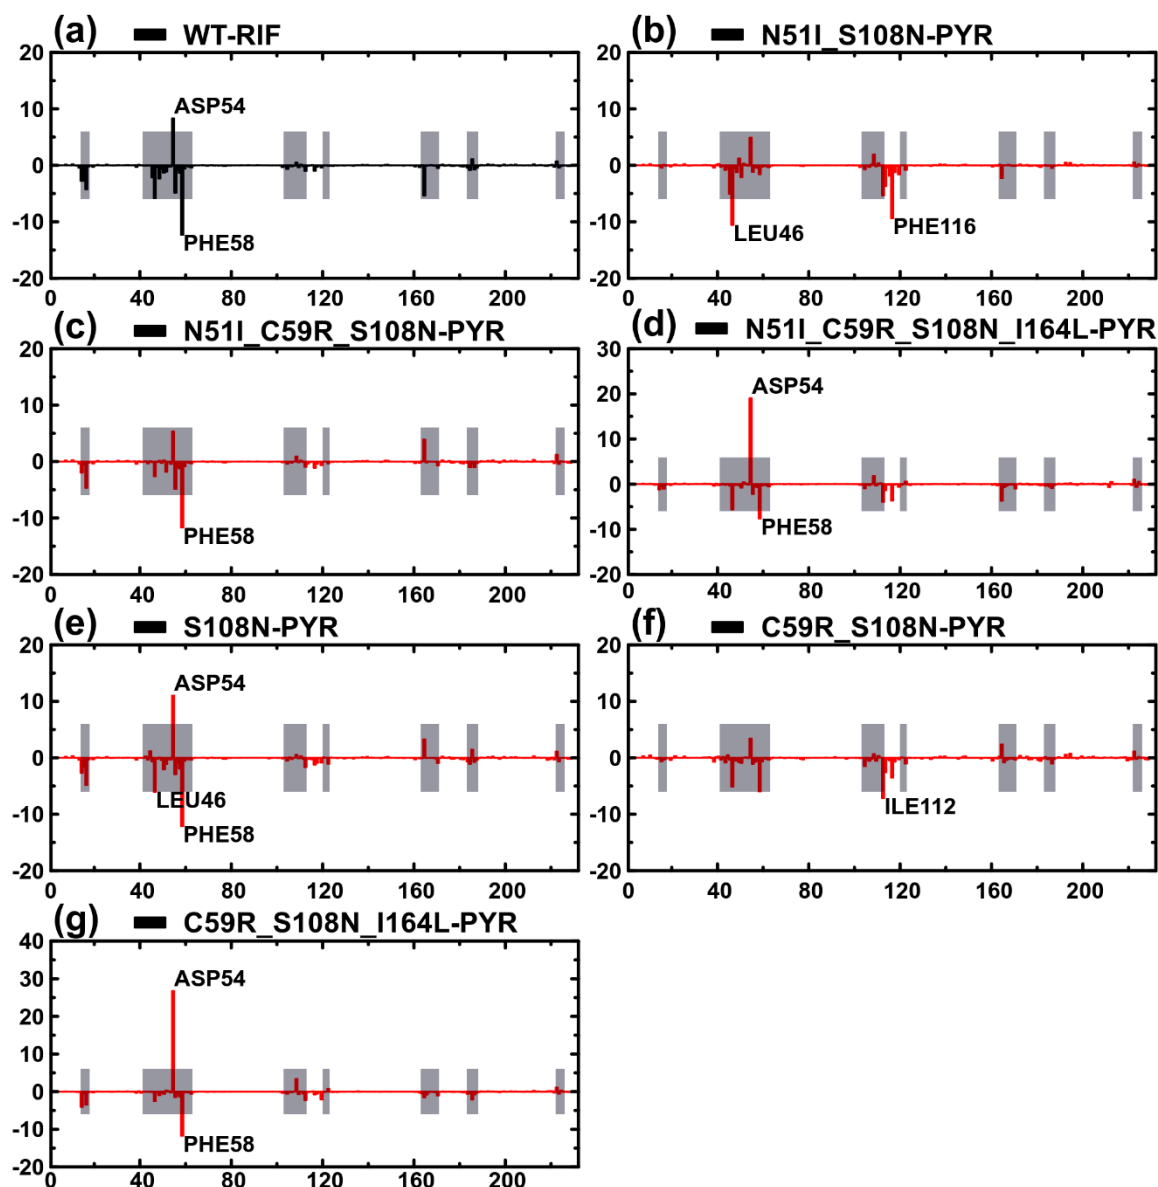

53

54 **Figure S7:** Total binding free energy decomposed on per residue basis. Residues that yielded  
55 significant contribution to binding free energy were labelled.

**Table S6:** MMPBSA analysis. Summary of residues that yielded substantial binding free energy changes (more than 2 kJ/mol) because of mutation (s).

| System                | Energy change (wildtype less mutated)    |                                                              |                                     |                                              |
|-----------------------|------------------------------------------|--------------------------------------------------------------|-------------------------------------|----------------------------------------------|
|                       | Residue number                           | Energy difference: -ve (kJ/mol)                              | Residue number                      | Energy difference: +ve (kJ/mol)              |
| S108N                 | 164<br>54<br>48<br>55                    | -8.62<br>-2.71<br>-2.41<br>-1.97                             | -                                   | -                                            |
| N51I_S108N            | 58<br>16<br>55<br>164<br>14<br>15        | -10.74<br>-4.35<br>-3.73<br>-3.08<br>-2.69<br>-2.32          | 45<br>54<br>113<br>112<br>46<br>116 | 2.90<br>3.42<br>3.59<br>4.33<br>4.75<br>8.42 |
| C59R_S108N            | 164<br>58<br>16<br>55<br>14<br>15        | -7.71<br>-6.35<br>-3.89<br>-3.80<br>-2.65<br>-2.10           | 113<br>116<br>54<br>112             | 2.47<br>2.55<br>4.91<br>6.16                 |
| N51I_C59R_S108N       | 164<br>46<br>48<br>15<br>45              | -9.26<br>-3.21<br>-2.49<br>-2.19<br>-2.01                    | 54                                  | 2.98                                         |
| C59R_S108N_I164L      | 54<br>164<br>55<br>46<br>108<br>15<br>45 | -18.42<br>-3.82<br>-3.42<br>-3.29<br>-2.87<br>-2.31<br>-2.01 | 185                                 | 3.22                                         |
| N51I_C59R_S108N_I164L | 54<br>58<br>16<br>55<br>15<br>48         | -10.71<br>-4.72<br>-3.22<br>-2.68<br>-2.29<br>-2.15          | 116<br>112                          | 2.70<br>2.92                                 |

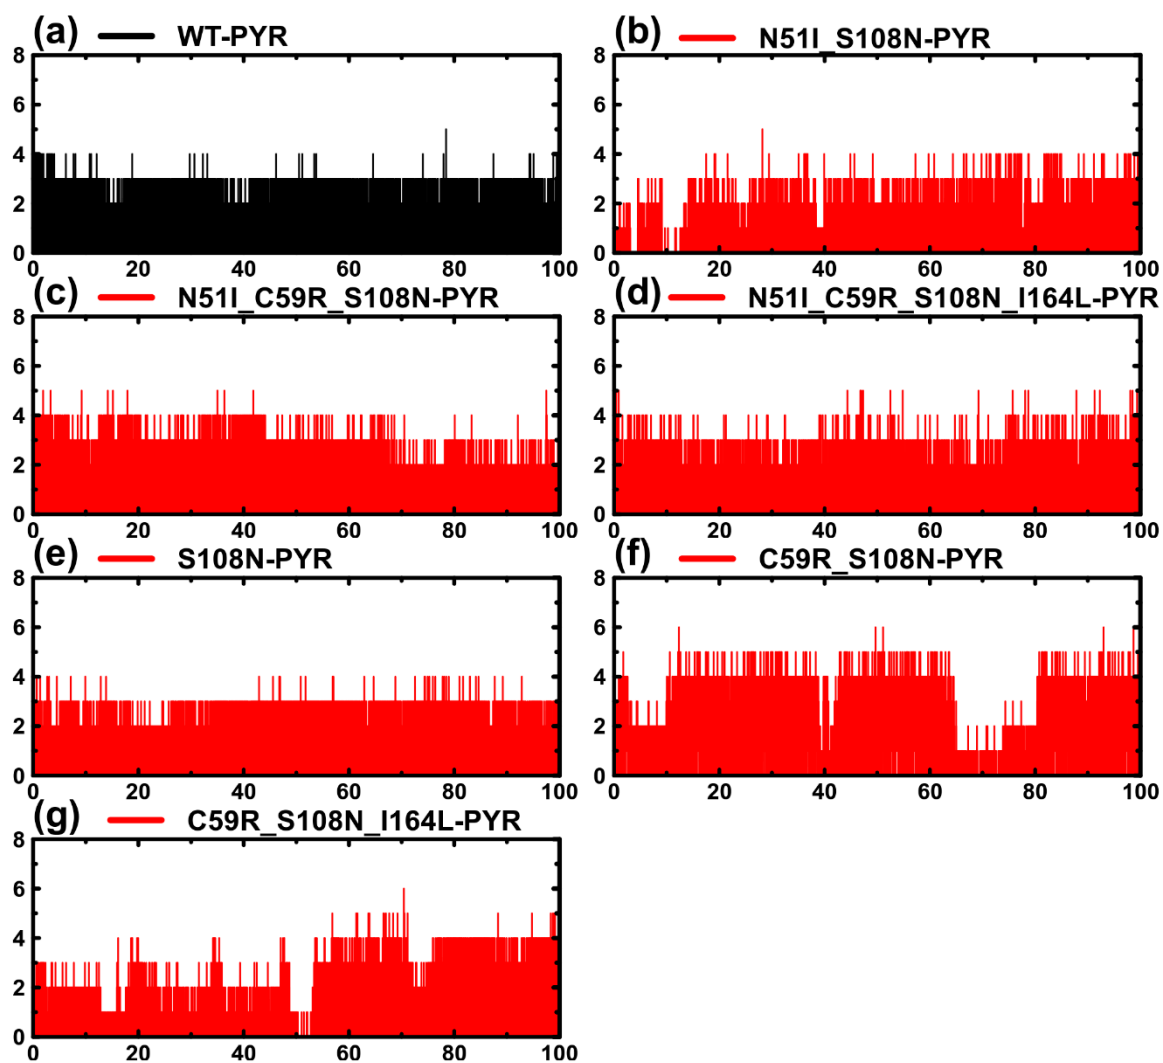

60

61 **Figure S8:** Hydrogen bond numbers yielded during 100ns simulation

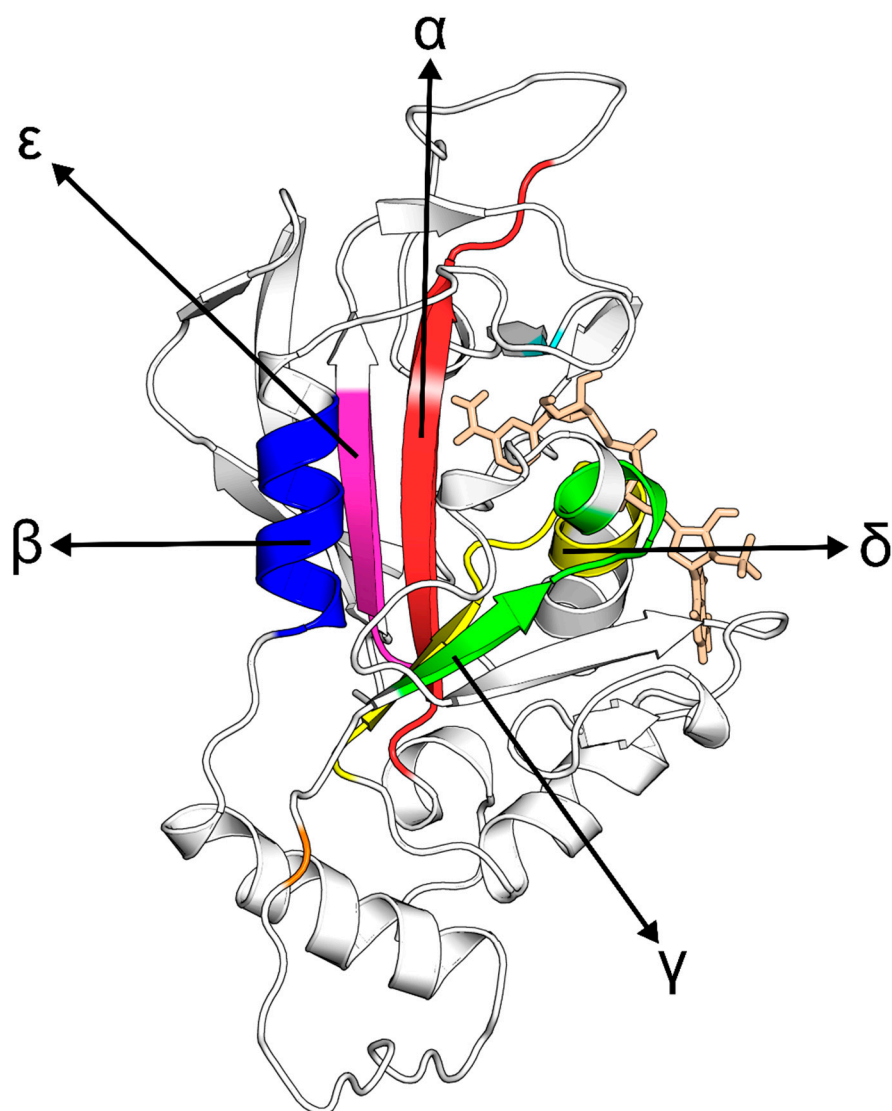

63 **Figure S9: DHFR structure with mapped communication hubs (High  $BC$  centres).**  
 64 Different hubs are shown on separate secondary structures and numbered in ascending order  
 65 based on residue numbering: 1:10-21, 2:55-63, 3:101-109, 4:159-170, 5:180-185. 41 and 196  
 66 are also mapped and do not belong to any of the hubs.  
 67



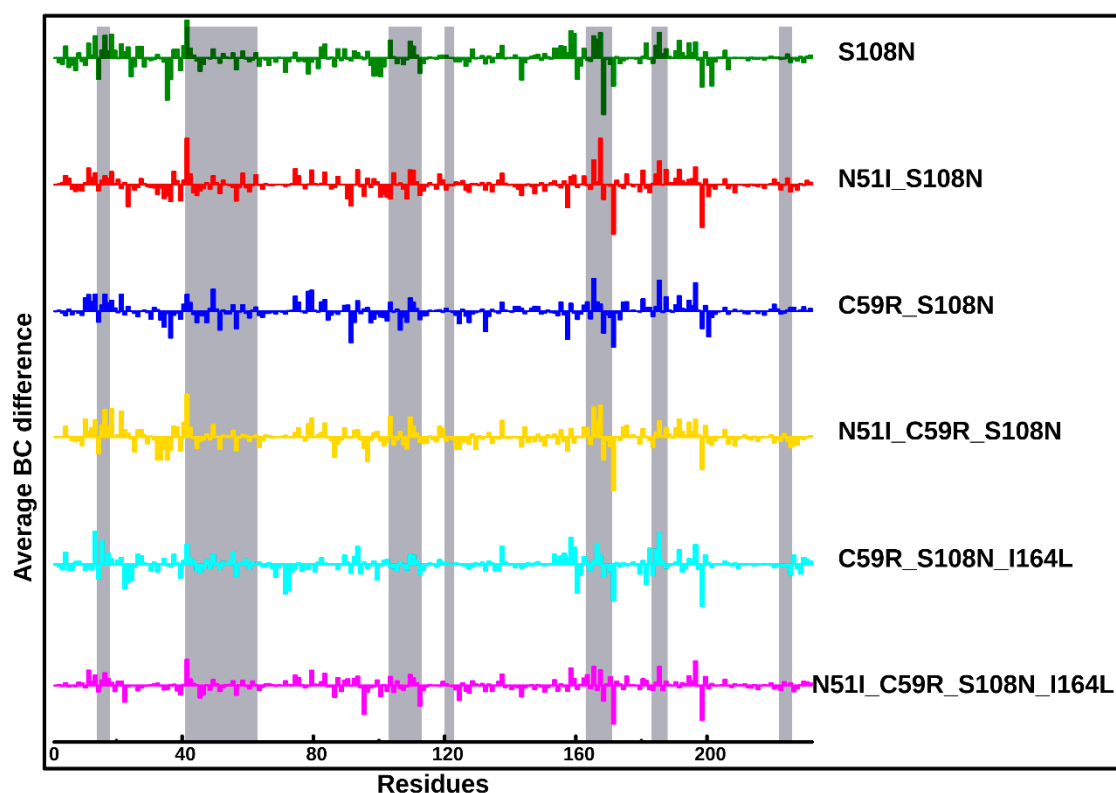

**Figure S10. Effect of mutation on residue centrality (WT-free less mutant-free):** Changes in residue betweenness centrality (average  $BC$  differences( $\Delta BC$ )) were obtained from calculations of WT-free less mutant-free values. Upward facing bars represent decrease in average  $BC$  for mutant-free relative to WT-free systems and vice versa for downward facing bars. Height and depth of bars represent magnitude of change. Shaded areas are regions of ligand interaction within the active site.

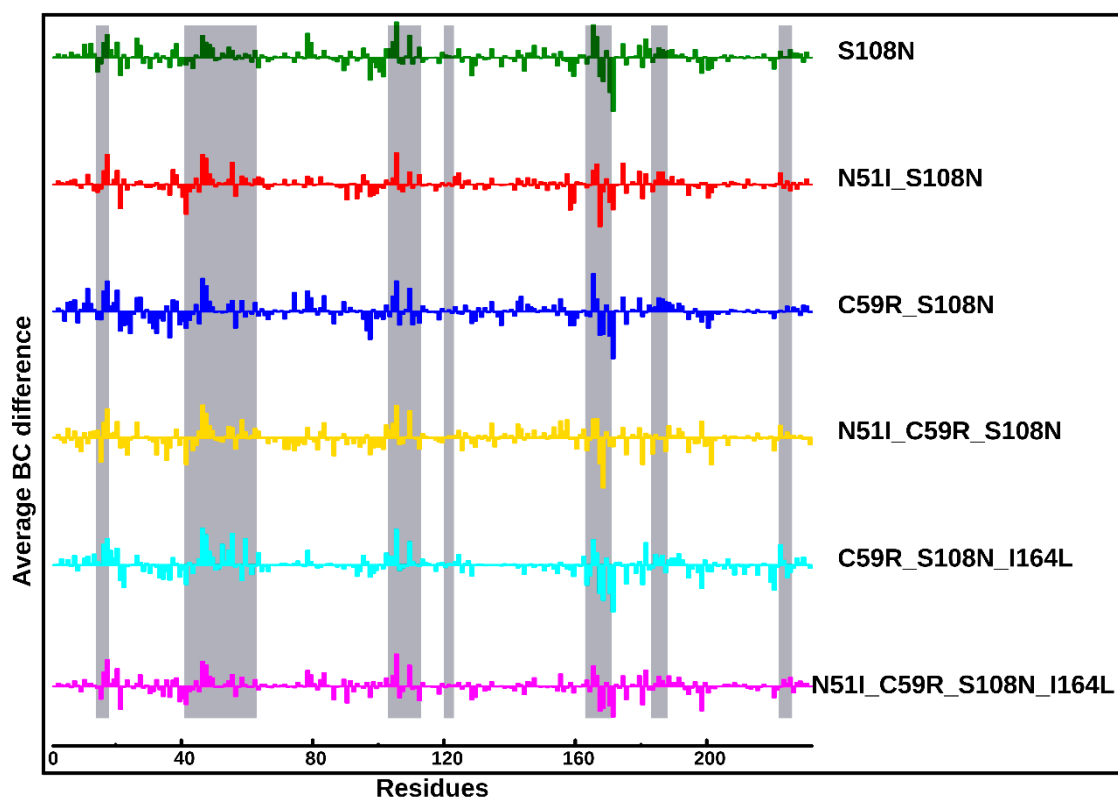

**Figure S11. Effect of mutation on residue centrality (WT-bound less mutant-bound):** Changes in residue centrality (average  $BC$  differences( $\Delta BC$ )) were obtained from calculations of WT-bound less mutant-bound values. Plotting scheme similar to figure S10 was applied. Shaded areas are regions of ligand interaction within the active site.

## Pyrimethamine - bound

(a) S108N

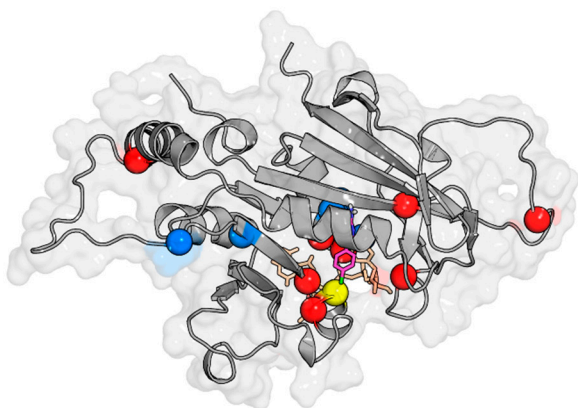

(b) N51I\_S108N

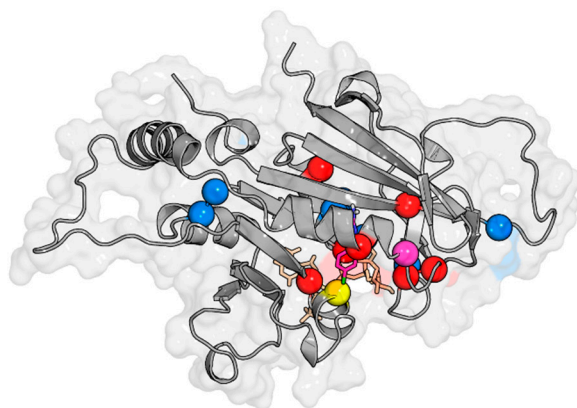

(c) C59R\_S108N

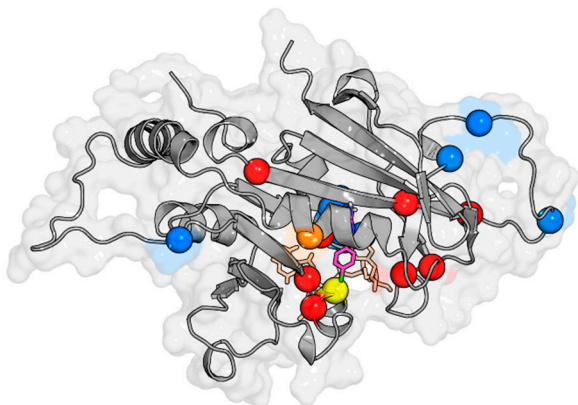

(d) N51I\_C59R\_S108N

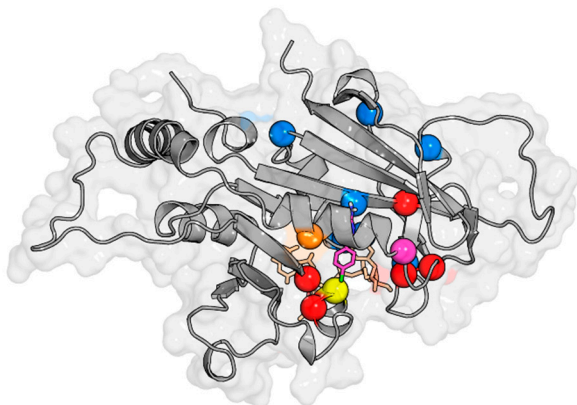

(e) C59R\_S108N\_I164L

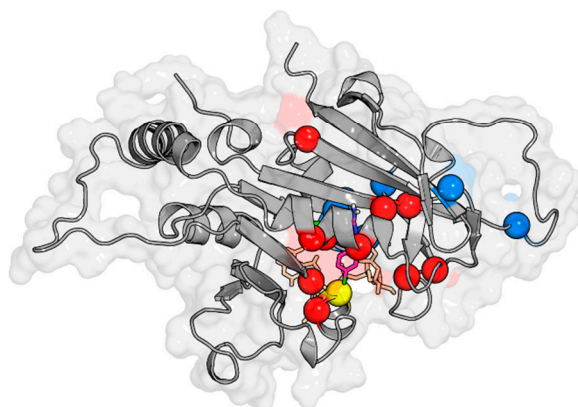

(f) N51I\_C59R\_S108N\_I164L

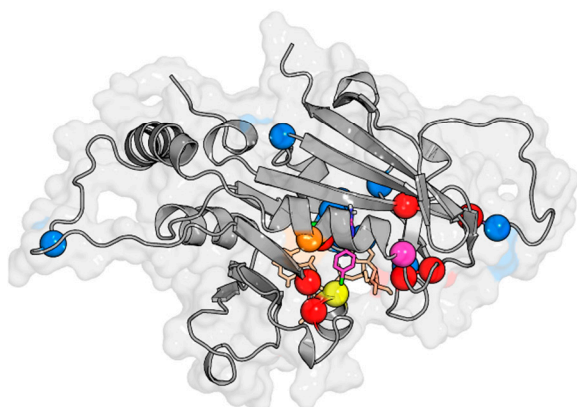

83  
84 **Figure S12:** Structural mapping of residues that yielded large changes in average *BC* values  
85 (WT-PYR less Mutant-PYR) for pyrimethamine-bound *pf*DHFR models.

**A. Pyrimethamine-free  
(WT less Mutants)**

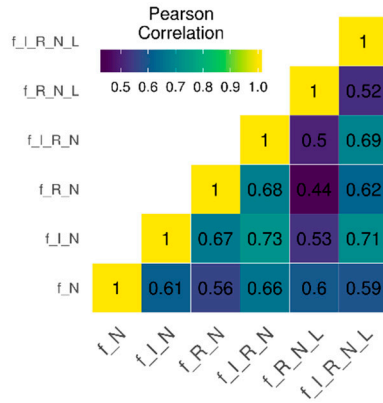

**B. Pyrimethamine-bound  
(WT less Mutants)**

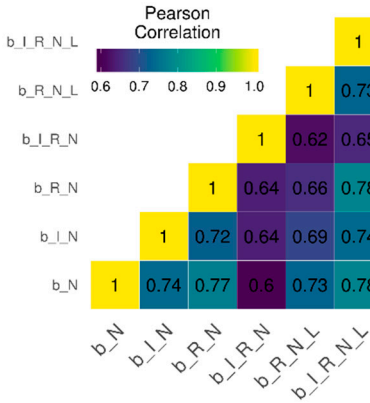

**C. Pyrimethamine-free less  
Pyrimethamine-bound**

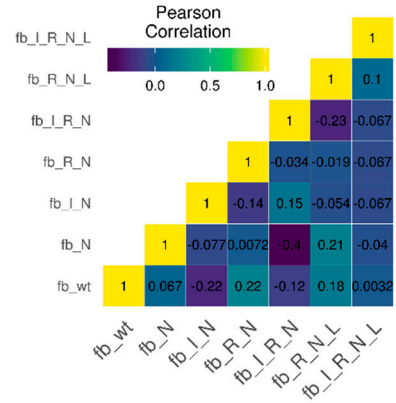

**D. All versus all**

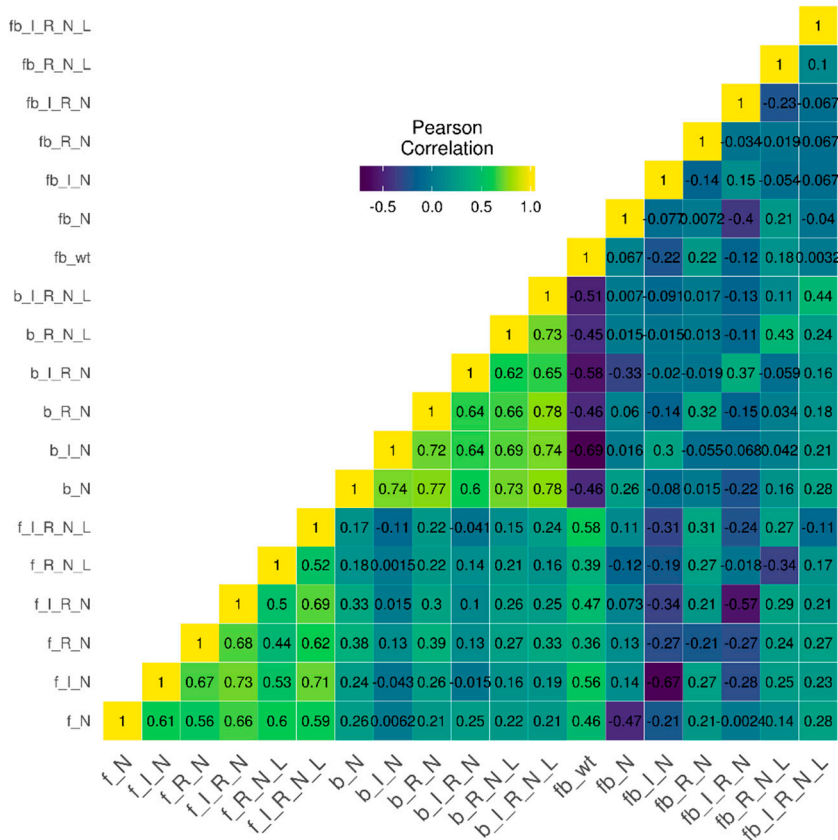

86

87 **Figure S13: Pairwise Pearson's correlation heatmap of average BC differences( $\Delta$ BC):**  
88 Key: N: S108N, I\_N: N51I\_S108N, R\_N: C59R\_S108N, I\_R\_N: N51I\_C59R\_S108N,  
89 R\_N\_L: C59R\_S108N\_I164L, I\_R\_N\_L: N51I\_C59R\_S108N\_I164L. The precursors f, b,  
90 and fb represent systems A: Pyrimethamine free systems (WT less mutants), B:  
91 Pyrimethamine-bound systems (WT- pyrimethamine less mutants- pyrimethamine), and C:  
92 Pyrimethamine-free less pyrimethamine-bound systems respectively.

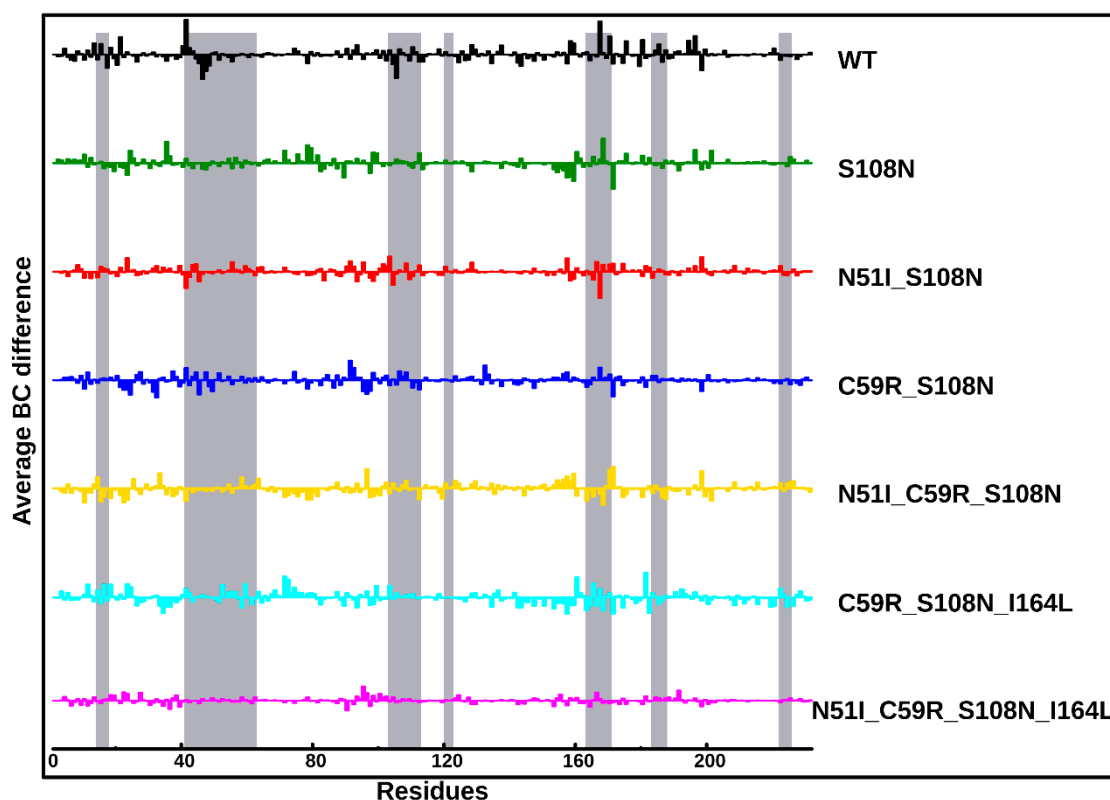

**Figure S14: Effects of ligand binding on residue centrality (pyrimethamine-free less pyrimethamine-bound).** Effects of ligand binding on residue centrality. Changes in residue centrality (average BC differences ( $\Delta BC$ )) were obtained from calculations of pyrimethamine-free less pyrimethamine-bound values. Upward facing bars represent decrease in  $BC$  for pyrimethamine-bound relative to pyrimethamine-free system and vice versa for downward facing bars. Height and depth of bars represent magnitude of change. Shaded areas are regions of ligand interaction within the active site.

**Table S7:** Summary of equilibrated trajectory regions sampled for analyses of binding free energy, and dynamic residue interaction network (DRN).

|                     | System                      | Time (ns) |
|---------------------|-----------------------------|-----------|
| Pyrimethamine-bound | Wildtype – PYR              | 85 - 100  |
|                     | S108N – PYR                 | 85 - 100  |
|                     | N51I_S108N – PYR            | 85 - 100  |
|                     | C59R_S108N – PYR            | 85 - 100  |
|                     | N51I_C59R_S108N – PYR       | 85 - 100  |
|                     | C59R_S108N_I164L – PYR      | 85 - 100  |
|                     | N51I_C59R_S108N_I164L – PYR | 85 - 100  |
| Pyrimethamine-free  | Wildtype                    | 70 – 85   |
|                     | S108N                       | 85 - 100  |
|                     | N51I_S108N                  | 85 - 100  |
|                     | C59R_S108N                  | 85 - 100  |
|                     | N51I_C59R_S108N             | 85 - 100  |
|                     | C59R_S108N_I164L            | 85 - 100  |
|                     | N51I_C59R_S108N_I164L       | 85 - 100  |
